# Supplementary material
Source: HighWire-hosted journal article supplement (https://erj.ersjournals.com/content/58/3/1902107)
Supplement: inline-supplementary-material-6 [file inline-supplementary-material-6.pdf]

**Table E1:** Diagnoses included under the larger category of “pregnancy complications”.

| Classification                                                                               | N    | %     |
|----------------------------------------------------------------------------------------------|------|-------|
| Ectopic pregnancy                                                                            | 13   | 0.17  |
| Contraceptive and procreative management                                                     | 1    | 0.01  |
| Diabetes or abnormal glucose tolerance complicating pregnancy; childbirth; or the puerperium | 104  | 1.38  |
| Early or threatened labor                                                                    | 240  | 3.19  |
| Fetal distress and abnormal forces of labor                                                  | 167  | 2.22  |
| Fetopelvic disproportion; obstruction                                                        | 40   | 0.53  |
| Forceps delivery                                                                             | 1    | 0.01  |
| Hemorrhage during pregnancy; abruption placenta;                                             | 208  | 2.76  |
| Hypertension complicating pregnancy; childbirth and the puerperium                           | 755  | 10.04 |
| Induced abortion                                                                             | 21   | 0.28  |
| Malposition; malpresentation                                                                 | 311  | 4.13  |
| Miscellaneous disorders                                                                      | 12   | 0.16  |
| Normal pregnancy and/or delivery                                                             | 102  | 1.36  |
| OB-related trauma to perineum and vulva                                                      | 1190 | 15.82 |
| Other complications of birth; puerperium affecting management of mother                      | 1160 | 15.42 |
| Other complications of pregnancy                                                             | 657  | 8.73  |
| Polyhydramnios and other problems of amniotic cavity                                         | 834  | 11.09 |
| Postabortion complications                                                                   | 9    | 0.12  |
| Previous C-section                                                                           | 585  | 7.78  |
| Prolonged pregnancy                                                                          | 949  | 12.61 |
| Spontaneous abortion                                                                         | 16   | 0.21  |
| Umbilical cord complication                                                                  | 148  | 1.97  |
