# Supplementary material
Source: HighWire-hosted journal article supplement (https://erj.ersjournals.com/content/58/3/1902107)
Supplement: inline-supplementary-material-7 [file inline-supplementary-material-7.pdf]

**Table E2:** In-house mortality and dyspnea ratings among patients with pregnancy complications.

|                      | dead n | Total |
|----------------------|--------|-------|
| dyspnea on admission |        |       |
| 0                    | 0      | 7902  |
| 1-3                  | 0      | 21    |
| ≥4                   | 0      | 7     |
| missing              | 0      | 6076  |
| dyspnea on admission | n      |       |
| 0                    | 0      | 7902  |
| 1-3                  | 0      | 21    |
| ≥4                   | 0      | 7     |
| missing              | 0      | 6076  |
