# Supplementary material
Source: HighWire-hosted journal article supplement (https://erj.ersjournals.com/content/58/3/1902107)
Supplement: inline-supplementary-material-8 [file inline-supplementary-material-8.pdf]

Table E3. In-hospital mortality by every rating for dyspnea on admission.

| Dyspnea on admission | Number of deaths | Number of patients | Percent death |
|----------------------|------------------|--------------------|---------------|
| 0                    | 496              | 60,128             | 0.82          |
| 1                    | 31               | 1,304              | 2.38          |
| 2                    | 40               | 1,548              | 2.58          |
| 3                    | 50               | 1,899              | 2.63          |
| 4                    | 23               | 593                | 3.88          |
| 5                    | 30               | 955                | 3.14          |
| 6                    | 13               | 300                | 4.33          |
| 7                    | 11               | 304                | 3.62          |
| 8                    | 13               | 235                | 5.53          |
| 9                    | 2                | 52                 | 3.85          |
| 10                   | 0                | 44                 | 0.00          |
| Overall              | 709              | 67362              | 1.05          |
