# Supplementary material
Source: HighWire-hosted journal article supplement (https://erj.ersjournals.com/content/58/3/1902107)
Supplement: inline-supplementary-material-9 [file inline-supplementary-material-9.pdf]

Table E4a. Unadjusted models of in hospital and 2-year mortality

|                                            | In hospital mortality | p-value | 2-years mortality | p-value |
|--------------------------------------------|-----------------------|---------|-------------------|---------|
|                                            | *OR (95% CI)          |         | *HR (95% CI)      |         |
| Dyspnea in the past 24 hours (reference=0) |                       |         |                   |         |
| Dyspnea 1-3                                | 2.9 (2.3-3.6)         | <.001   | 2.3 (2.1-2.5)     | <.001   |
| Dyspnea ≥ 4                                | 3.6 (3.0-4.3)         | <.001   | 2.4 (2.2-2.6)     | <.001   |

Table E4b. Adjusted models of in hospital and 2-year mortality

|                                               | In hospital mortality | p-value | 2-years mortality | p-value |
|-----------------------------------------------|-----------------------|---------|-------------------|---------|
|                                               | *aOR (95% CI)         |         | *aHR (95% CI)     |         |
| Dyspnea in the past 24 hours (reference=0)    |                       |         |                   |         |
| Dyspnea 1-3                                   | 1.8 (1.4-2.4)         | <.001   | 1.5 (1.3-1.6)     | <.001   |
| Dyspnea ≥ 4                                   | 2.4 (2.0-2.9)         | <.001   | 1.5 (1.4-1.6)     | <.001   |
| Age category (reference="18-34")              |                       |         |                   |         |
| 35-50 years                                   | 3.6 (1.8-7.2)         | <.001   | 4.2 (3.1-5.6)     | <.001   |
| 51-65 years                                   | 6.4 (3.3-12.4)        | <.001   | 8.7 (6.6-11.4)    | <.001   |
| > 65 years                                    | 11.4 (6.0-21.8)       | <.001   | 18.6 (14.2-24.4)  | <.001   |
| Gender (reference=male)                       |                       |         |                   |         |
| Female                                        | 1.1 (0.9-1.3)         | 0.58    | 0.98 (0.93-1.05)  | 0.62    |
| Race (reference=white)                        |                       |         |                   |         |
| Black                                         | 0.7 (0.5-0.9)         | 0.003   | 0.95 (0.88-1.04)  | 0.39    |
| Other                                         | 1.8 (1.5-2.3)         | <.001   | 0.94 (0.86-1.04)  | 0.24    |
| Sofa category <sup>a</sup> (ref=0)            |                       |         |                   |         |
| 1-3                                           | 1.9 (1.6-2.3)         | <.001   | 1.7 (1.6-1.8)     | <.001   |
| 4-6                                           | 3.8 (2.9-4.8)         | <.001   | 3.0 (2.7-3.3)     | <.001   |
| >6                                            | 19.4 (11.6-32.4)      | <.001   | 5.5 (3.9-7.8)     | <.001   |
| Elixhauser predicted mortality <sup>b</sup> % | 1.13 (1.11-1.14)      | <.001   | 1.06 (1.06-1.07)  | <.001   |

\*Adjusted Odds Ratio (aOR)

\*Adjusted Hazards Ratio (aHR)

<sup>a</sup>SOFA denotes Sequential Organ Failure Assessment score. Scores range from 0 to 24, with higher scores suggesting higher mortality.<sup>b</sup>Elixhauser predicted mortality is based on Elixhauser comorbidities
