# Supplementary material
Source: HighWire-hosted journal article supplement (https://erj.ersjournals.com/content/58/3/1902107)
Supplement: inline-supplementary-material-10 [file inline-supplementary-material-10.pdf]

Table E5: Dyspnea “Unable to respond” vs Respondents

Patient characteristics and outcomes of patients who were “unable to respond” dyspnea and a comparison to the population of patients who were able to report dyspnea and are included in our cohort.

|                                               | Study cohort n (%) | Dyspnea unable to respond n (%) | P-value |
|-----------------------------------------------|--------------------|---------------------------------|---------|
| Total                                         | 67362              | 706                             |         |
| Female                                        | 38256 (56.8)       | 429 (60.7)                      | 0.03    |
| Race                                          |                    |                                 |         |
| White                                         | 46522 (69.1)       | 441 (62.4)                      | <.001   |
| Black                                         | 9666 (14.4)        | 135 (19.1)                      |         |
| Others                                        | 11175 (16.6)       | 130 (18.4)                      |         |
| Age, median (IQR)                             | 60 (43-72)         | 77 (60-85)                      | <.001   |
| English as a second language                  | 6252 (9.2)         | 535 (75.8)                      | <.001   |
| Department of Admission                       |                    |                                 |         |
| Medicine                                      | 33989 (50.5)       | 550 (77.9)                      | <.001   |
| Surgery                                       | 16421 (24.4)       | 108 (15.3)                      |         |
| Others                                        | 16953 (25.2)       | 48 (6.8)                        |         |
| ED Admission                                  |                    |                                 | <.001   |
| Yes                                           | 34073 (50.6)       | 561 (79.4)                      |         |
| No                                            | 22289 (49.4)       | 145 (20.5)                      |         |
| Day of admission                              |                    |                                 | <.001   |
| Weekday                                       | 55565 (82.5)       | 535 (75.8)                      |         |
| Weekend                                       | 11798 (17.5)       | 171 (24.2)                      |         |
| Time of admission                             |                    |                                 | <.001   |
| Day (7a-7p)                                   | 33975 (50.4)       | 275 (38.9)                      |         |
| Night (7p-7a)                                 | 33388 (49.6)       | 431 (61.1)                      |         |
| Admission Diagnoses                           |                    |                                 | <.001   |
| Disease of the circulatory system             | 10910 (4.6)        | 93 (13.2)                       |         |
| Diseases of the respiratory system            | 3079 (16.2)        | 61 (8.6)                        |         |
| Diseases of the digestive system              | 8371 (12.4)        | 58 (8.2)                        |         |
| Pregnancy complications                       | 8006 (11.9)        | 77 (10.9)                       |         |
| Neoplasms                                     | 7549 (11.2)        | 23 (3.3)                        |         |
| Injury and Poisoning                          | 7500 (11.1)        | 98 (13.9)                       |         |
| Diseases of the musculoskeletal system        | 5072 (7.5)         | 10 (1.4)                        |         |
| All others                                    | 16876 (25.1)       | 286 (40.5)                      |         |
| Elixhauser predicted mortality % median (IQR) | 0.37 (0.27-0.88)   | 0.81 (0.35-2.28)                | <.001   |
| SOFA score                                    |                    |                                 | <.001   |
| 0                                             | 45663 (67.8)       | 395 (55.9)                      |         |
| 1-3                                           | 18055 (26.8)       | 258 (36.5)                      |         |
| 4-6                                           | 3476 (5.2)         | 51 (7.2)                        |         |
| >6                                            | 168 (0.2)          | 2 (0.2)                         |         |
