# Supplementary material
Source: HighWire-hosted journal article supplement (https://erj.ersjournals.com/content/58/3/1902107)
Supplement: inline-supplementary-material-11 [file inline-supplementary-material-11.pdf]

Table E6a. Unadjusted models of in hospital and 2-year mortality

|                                    | In hospital mortality | p-value | 2-years mortality | p-value |
|------------------------------------|-----------------------|---------|-------------------|---------|
|                                    | *OR (95% CI)          |         | *HR (95% CI)      |         |
| Dyspnea on admission (reference=0) |                       |         |                   |         |
| Dyspnea 1-2                        | 3.1 (2.6-3.8)         | <.001   | 2.3 (2.0-2.5)     | <.001   |
| Dyspnea ≥ 3                        | 4.6 (3.7-5.8)         | <.001   | 2.3 (2.1-2.5)     | <.001   |

Table E6b. Adjusted models of in hospital and 2-year mortality

|                                               | In hospital mortality | p-value | 2-years mortality | p-value |
|-----------------------------------------------|-----------------------|---------|-------------------|---------|
|                                               | *aOR (95% CI)         |         | *aHR (95% CI)     |         |
| Dyspnea on admission (reference=0)            |                       |         |                   |         |
| Dyspnea 1-2                                   | 2.1 (1.6-2.7)         | <.001   | 1.5 (1.4-1.7)     | <.001   |
| Dyspnea ≥ 3                                   | 2.7 (2.2-2.3)         | <.001   | 1.5 (1.4-1.7)     | <.001   |
| Age category (reference="18-34")              |                       |         |                   |         |
| 35-50 years                                   | 3.7 (1.9-7.4)         | <.001   | 4.3 (3.2-5.8)     | <.001   |
| 51-65 years                                   | 6.8 (3.5-13.1)        | <.001   | 9.1 (6.9-12.0)    | <.001   |
| > 65 years                                    | 12.3 (6.4-23.3)       | <.001   | 19.8 (15.2-25.9)  | <.001   |
| Gender (reference=male)                       |                       |         |                   |         |
| Female                                        | 1.1 (0.9-1.2)         | 0.58    | 0.9 (0.9-1.1)     | 0.62    |
| Race (reference=white)                        |                       |         |                   |         |
| Black                                         | 0.7 (0.5-0.9)         | 0.003   | 0.9 (0.9-1.1)     | 0.39    |
| Other                                         | 1.8 (1.5-2.2)         | <.001   | 0.9 (0.9-1.0)     | 0.24    |
| Sofa category <sup>a</sup> (ref=0)            |                       |         |                   |         |
| 1-3                                           | 2.0 (1.6-2.4)         | <.001   | 1.7 (1.6-1.8)     | <.001   |
| 4-6                                           | 3.9 (3.0-4.9)         | <.001   | 3.0(2.8-3.3)      | <.001   |
| >6                                            | 18.5 (10.9-31.5)      | <.001   | 5.4 (3.8-7.6)     | <.001   |
| Elixhauser predicted mortality <sup>b</sup> % | 1.12 (1.11-1.14)      | <.001   | 1.06 (1.06-1.07)  | <.001   |

\*Adjusted Odds Ratio (aOR)

\*Adjusted Hazards Ratio (aHR)

<sup>a</sup>SOFA denotes Sequential Organ Failure Assessment score. Scores range from 0 to 24, with higher scores suggesting higher mortality.

<sup>b</sup>Elixhauser predicted mortality is based on Elixhauser comorbidities

Table E6c. Unadjusted models of in hospital and 2-year mortality

|                                            | In hospital mortality | p-value | 2-years mortality | p-value |
|--------------------------------------------|-----------------------|---------|-------------------|---------|
|                                            | *OR (95% CI)          |         | *HR (95% CI)      |         |
| Dyspnea in the past 24 hours (reference=0) |                       |         |                   |         |
| Dyspnea 1-2                                | 2.9 (2.1-4.0)         | <.001   | 2.3 (2.0-2.6)     | <.001   |
| Dyspnea ≥ 3                                | 3.4 (2.9-4.0)         | <.001   | 2.3 (2.2-2.5)     | <.001   |

Table E6d. Adjusted models of in hospital and 2-year mortality

|                                               | In hospital mortality | p-value | 2-years mortality  | p-value |
|-----------------------------------------------|-----------------------|---------|--------------------|---------|
|                                               | *aOR (95% CI)         |         | *aHR (95% CI)      |         |
| Dyspnea in the past 24 hours (reference=0)    |                       |         |                    |         |
| Dyspnea 1-2                                   | 1.9 (1.4-2.7)         | <.001   | 1.5 (1.3-1.7)      | <.001   |
| Dyspnea ≥ 3                                   | 2.2 (1.8-2.7)         | <.001   | 1.5 (1.4-1.7)      | <.001   |
| Age category (reference="18-34")              |                       |         |                    |         |
| 35-50 years                                   | 3.6 (1.8-7.2)         | <.001   | 4.1 (3.1-5.8)      | <.001   |
| 51-65 years                                   | 6.4 (3.3-12.4)        | <.001   | 8.7 (6.6-11.4)     | <.001   |
| > 65 years                                    | 11.4 (6.0-21.8)       | <.001   | 18.6 (14.2-24.4)   | <.001   |
| Gender (reference=male)                       |                       |         |                    |         |
| Female                                        | 1.1 (0.9-1.3)         | 0.58    | 0.98 (0.93-1.1)    | 0.73    |
| Race (reference=white)                        |                       |         |                    |         |
| Black                                         | 0.7 (0.5-0.9)         | 0.003   | 0.96 (0.89-1.04)   | 0.31    |
| Other                                         | 1.8 (1.5-2.3)         | <.001   | 0.95 (0.86-1.04)   | 0.26    |
| Sofa category <sup>a</sup> (ref=0)            |                       |         |                    |         |
| 1-3                                           | 1.9 (1.6-2.3)         | <.001   | 1.68 (1.58-1.79)   | <.001   |
| 4-6                                           | 3.8 (2.9-4.8)         | <.001   | 2.97(2.69-3.27)    | <.001   |
| >6                                            | 19.2 (11.5-32.1)      | <.001   | 5.48 (3.89-7.72)   | <.001   |
| Elixhauser predicted mortality <sup>b</sup> % | 1.13 (1.11-1.14)      | <.001   | 1.06 (1.056-1.066) | <.001   |

\*Adjusted Odds Ratio (aOR)

\*Adjusted Hazards Ratio (aHR)

<sup>a</sup>SOFA denotes Sequential Organ Failure Assessment score. Scores range from 0 to 24, with higher scores suggesting higher mortality.

<sup>b</sup>Elixhauser predicted mortality is based on Elixhauser comorbidities
