# Supplementary material
Source: HighWire-hosted journal article supplement (https://erj.ersjournals.com/content/58/3/1902107)
Supplement: inline-supplementary-material-12 [file inline-supplementary-material-12.pdf]

Table E7. Adjusted outcomes across primary and secondary outcomes, using a threshold of a dyspnea rating of 3 rather than 4, first using dyspnea on admission and second using dyspnea in the past 24 hours.

|                             | Dyspnea on admission (ref=dyspnea=0) |         |                  |         | Dyspnea in the past 24 hours (ref=dyspnea=0) |         |                  |         |
|-----------------------------|--------------------------------------|---------|------------------|---------|----------------------------------------------|---------|------------------|---------|
|                             | Dyspnea 1-2                          |         | Dyspnea ≥ 3      |         | Dyspnea 1-2                                  |         | Dyspnea ≥ 3      |         |
|                             | *aOR (95% CI)                        | p-value | aOR (95% CI)     | p-value | aOR (95% CI)                                 | p-value | aOR (95% CI)     | p-value |
| In-hospital mortality       | 2.05 (1.56-2.72)                     | <.001   | 2.69 (2.18-3.32) | <.001   | 1.92 (1.35-2.73)                             | <.001   | 2.22 (1.85-2.66) | <.001   |
| 2 years mortality           | 1.51 (1.36-1.67)                     | <.001   | 1.55 (1.41-1.69) | <.001   | 1.50 (1.32-1.71)                             | <.001   | 1.49 (1.39-1.60) | <.001   |
| Readmission 7 days          | 1.21 (1.11-1.45)                     | 0.04    | 1.31 (1.12-1.52) | <.001   | 1.46 (1.19-1.78)                             | <.001   | 1.12 (1.01-1.27) | 0.04    |
| Readmission 30 days         | 1.19 (1.07-1.31)                     | 0.04    | 1.3 (1.19-1.40)  | <.001   | 1.35 (1.14-1.28)                             | <.001   | 1.21 (1.14-1.28) | <.001   |
| Require rapid response      | 1.55 (1.39-1.73)                     | <.001   | 1.91 (1.75-2.09) | <.001   | 1.47 (1.28-0.59)                             | <.001   | 1.62 (1.51-1.74) | <.001   |
| Transferred to ICU          | 1.56 (1.36-1.79)                     | <.001   | 1.71 (1.53-1.90) | <.001   | 1.78 (1.51-0.47)                             | <.001   | 2.10 (1.93-2.28) | <.001   |
| Discharged to extended care | 1.18 (1.09-1.28)                     | <.001   | 1.32 (1.23-1.41) | <.001   | 1.09 (0.99-1.21)                             | 0.06    | 1.10 (1.04-1.15) | <.001   |
|                             | *aHR (95% CI)                        | p-value | aHR (95% CI)     | p-value | aHR (95% CI)                                 | p-value | aHR (95% CI)     | p-value |
| 2 years mortality           | 1.51 (1.36-1.67)                     | <.001   | 1.55 (1.41-1.69) | <.001   | 1.50(1.32-1.71)                              | <.001   | 1.49 (1.39-1.60) | <.001   |

\*aOR= Adjusted Odds Ratio

\*aHR=Adjusted Hazard Ratio

All models were adjusted for age, gender, race, sofa and elixhauser
