# Supplementary material
Source: HighWire-hosted journal article supplement (https://erj.ersjournals.com/content/58/3/1902107)
Supplement: inline-supplementary-material-13 [file inline-supplementary-material-13.pdf]

**Table E8. Service of patients who rated pain  $\geq 4$**   
 Clinical service and total numbers of patients per service  
 who reported pain of 4 or greater.

| SERVICE            | n      | %     |
|--------------------|--------|-------|
| CARDIAC MEDICINE   | 796    | 3.29  |
| CARDIAC SURGERY    | 142    | 0.59  |
| DENTAL             | 1      | 0     |
| GENERAL SURGERY    | 3675   | 15.18 |
| GENITOUROLOGY      | 585    | 2.42  |
| GYNECOLOGY         | 847    | 3.5   |
| MEDICINE           | 7697   | 31.8  |
| NEUROLOGY MEDICINE | 567    | 2.34  |
| NEUROSURGERY       | 1106   | 4.57  |
| OBSTETRICS         | 980    | 4.05  |
| ONCOLOGY           | 1411   | 5.83  |
| ORTHOPEDICS        | 3624   | 14.97 |
| OTALARYNGOLOGY     | 53     | 0.22  |
| PLASTIC SURGERY    | 606    | 2.5   |
| PSYCHIATRY         | 381    | 1.57  |
| THORACIC SURGERY   | 596    | 2.46  |
| TRAUMA             | 400    | 1.65  |
| VASCULAR SURGERY   | 741    | 3.06  |
| Total              | 24,208 | 100%  |
